# Supplementary material for: C-Reactive Protein Stimulates Nicotinic Acetylcholine Receptors to Control ATP-Mediated Monocytic Inflammasome Activation
Source: PubMed Central journal article supplement (PMC6077200; doi:10.3389/fimmu.2018.01604), 2018-07-30
Supplement: Presentation_1.pdf [file Presentation_1.pdf]

# **C-reactive protein stimulates nicotinic acetylcholine receptors to control ATP-mediated monocytic inflammasome activation**

**Katrin Richter<sup>1,\*†</sup>, Sabrina Sagawe<sup>1,†</sup>, Andreas Hecker<sup>1</sup>, Mira Küllmar<sup>1</sup>, Ingolf Askevold<sup>1</sup>, Jelena Damm<sup>1</sup>, Sarah Heldmann<sup>1</sup>, Michael Pöhlmann<sup>2</sup>, Sophie Ruhrmann<sup>2</sup>, Michael Sander<sup>2</sup>, Klaus-Dieter Schlüter<sup>3</sup>, Sigrid Wilker<sup>1</sup>, Inke R. König<sup>4,5</sup>, Wolfgang Kummer<sup>6</sup>, Winfried Padberg<sup>1</sup>, Arik J. Hone<sup>7</sup>, J. Michael McIntosh<sup>7-9</sup>, Anna Teresa Zakrzewicz<sup>1</sup>, Christian Koch<sup>2</sup>, and Veronika Grau<sup>1</sup>**

<sup>1</sup>Laboratory of Experimental Surgery, Department of General and Thoracic Surgery, Justus-Liebig-University Giessen, German Centre for Lung Research (DZL), Giessen, Germany,

<sup>2</sup>Department of Anesthesiology and Intensive Care Medicine, Justus-Liebig-University Giessen, Giessen, Germany,

<sup>3</sup>Physiological Institute, Justus-Liebig-University Giessen, Giessen, Germany,

<sup>4</sup>Institute of Medical Biometry and Statistics, University of Luebeck, Luebeck, Germany,

<sup>5</sup>Airway Research Center North (ARCN), German Center for Lung Research (DZL), Giessen, Germany,

<sup>6</sup>Institute of Anatomy and Cell Biology, Justus-Liebig-University Giessen, German Centre for Lung Research, Giessen, Germany,

<sup>7</sup>Department of Biology, University of Utah, Salt Lake City, UT, United States,

<sup>8</sup>George E. Wahlen Veterans Affairs Medical Center, Salt Lake City, UT, United States,

<sup>9</sup>Department of Psychiatry, University of Utah, Salt Lake City, UT, United States,

<sup>†</sup>These authors have contributed equally to this work.

## **\*Correspondence:**

Katrin Richter, Justus-Liebig-University of Giessen, Department of General and Thoracic Surgery, Laboratory of Experimental Surgery, Feulgenstr. 10 – 12, D-35392 Giessen; Tel. +49 641 985 45510; Fax: +49 641 985 44769;

E-mail address: [Katrin.Richter@chiru.med.uni-giessen.de](mailto:Katrin.Richter@chiru.med.uni-giessen.de)

**Supplementary Material includes Figures S1 - S4, Table S1 and Table S2.**

Figure S1

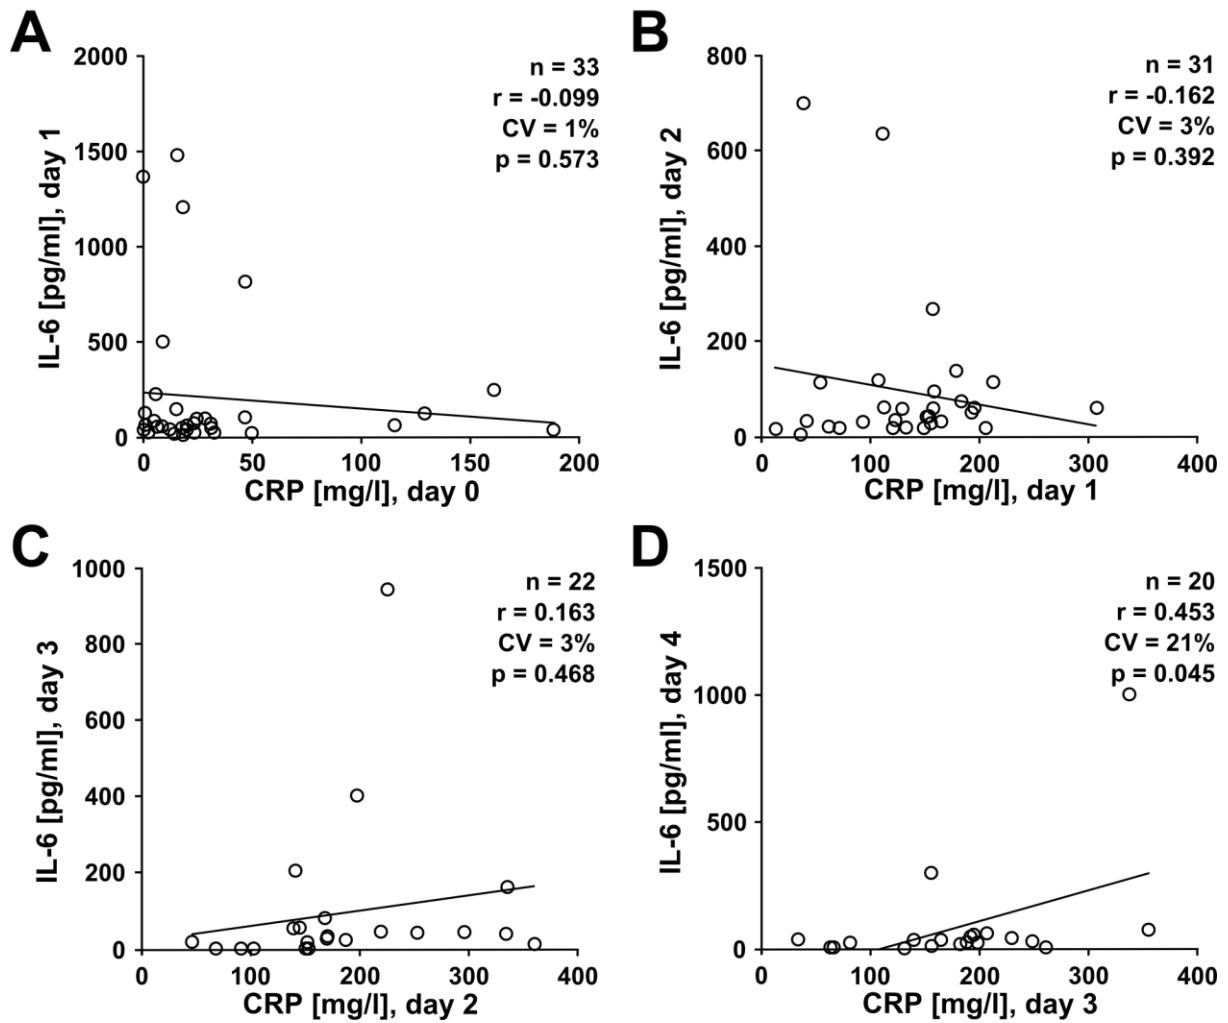

**FIGURE S1.** Levels of CRP do not negatively correlate with IL-6 levels in trauma patients. A monocentric prospective clinical study was performed on patients suffering from multiple traumata. Plasma levels of IL-6 were measured at daily intervals from the day of admission (day 0) until day 4 after trauma and a correlation analysis was performed with CRP values obtained one day earlier. **(A)** IL-6 at day 1 versus CRP at day 0, **(B)** IL-6 at day 2 versus CRP at day 1, **(C)** IL-6 at day 3 versus CRP at day 2, **(D)** a positive correlation was seen for IL-6 at day 4 versus CRP at day 3. Linear regression analysis,  $r$  = correlation coefficient,  $CV$  = coefficient of variation.

Figure S2

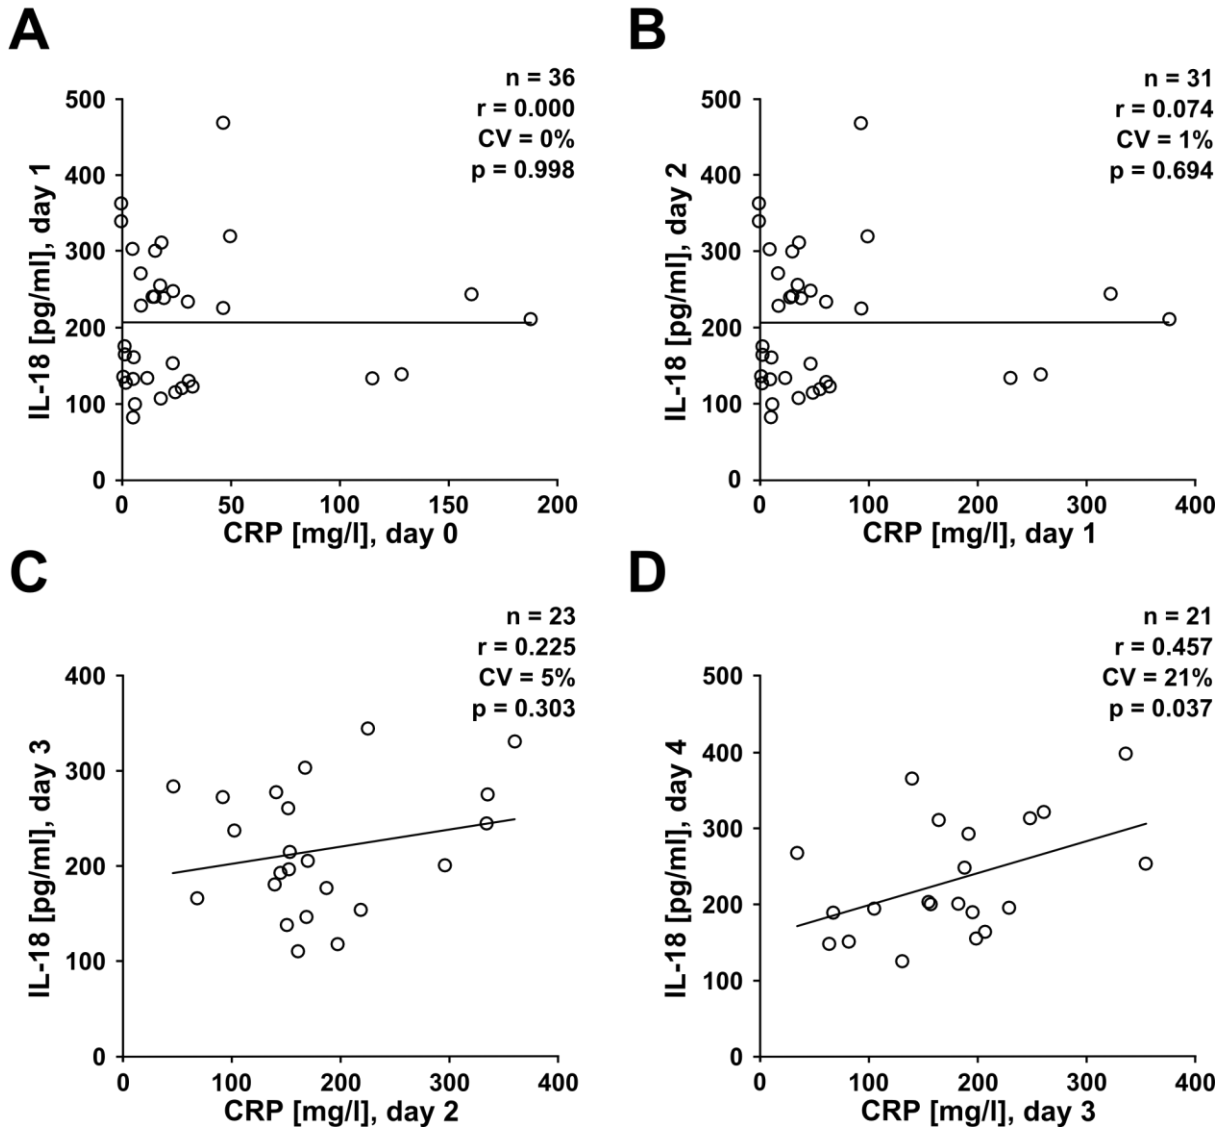

**FIGURE S2.** Levels of CRP do not negatively correlate with IL-18 levels in trauma patients. A monocentric prospective clinical study was performed on patients suffering from multiple traumata. Plasma levels of IL-18 were measured at daily intervals from the day of admission (day 0) until day 4 after trauma and a correlation analysis was performed with CRP values obtained one day earlier. **(A)** IL-18 at day 1 versus CRP at day 0, **(B)** IL-18 at day 2 versus CRP at day 1, **(C)** IL-18 at day 3 versus CRP at day 2, **(D)** a positive correlation was seen for IL-18 at day 4 versus CRP at day 3. Linear regression analysis,  $r$  = correlation coefficient,  $CV$  = coefficient of variation.

Figure S3

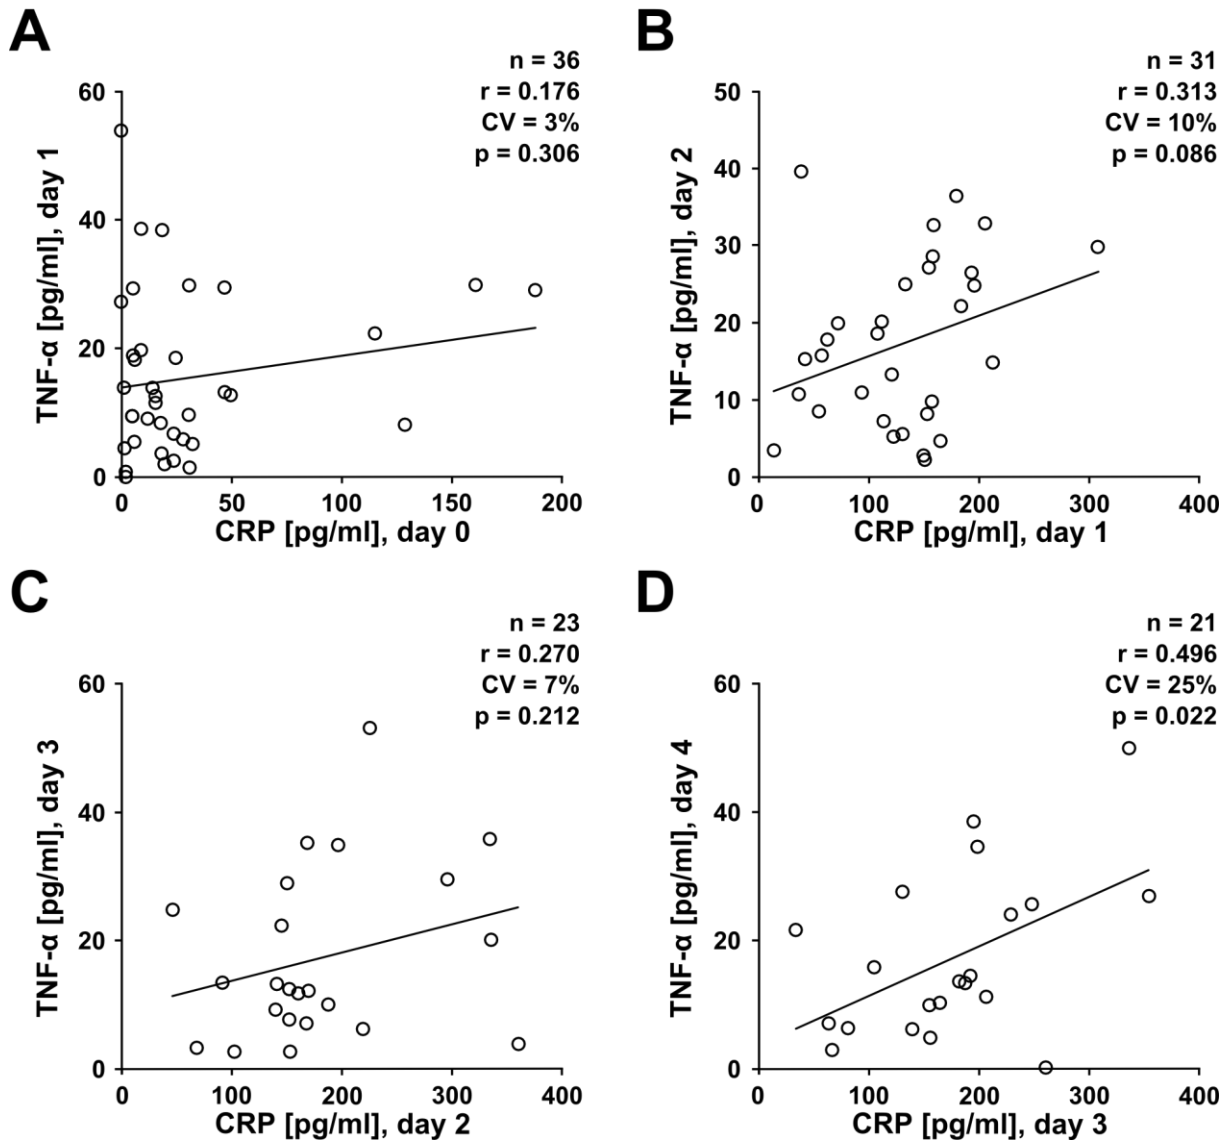

**FIGURE S3.** Levels of CRP do not negatively correlate with TNF- $\alpha$  levels in trauma patients. A monocentric prospective clinical study was performed on patients suffering from multiple traumata. Plasma levels of TNF- $\alpha$  were measured at daily intervals from the day of admission (day 0) until day 4 after trauma and a correlation analysis was performed with CRP values obtained one day earlier. **(A)** TNF- $\alpha$  at day 1 versus CRP at day 0, **(B)** TNF- $\alpha$  at day 2 versus CRP at day 1, **(C)** TNF- $\alpha$  at day 3 versus CRP at day 2, **(D)** a positive correlation was seen for TNF- $\alpha$  at day 4 versus CRP at day 3. Linear regression analysis,  $r$  = correlation coefficient,  $CV$  = coefficient of variation.

Figure S4

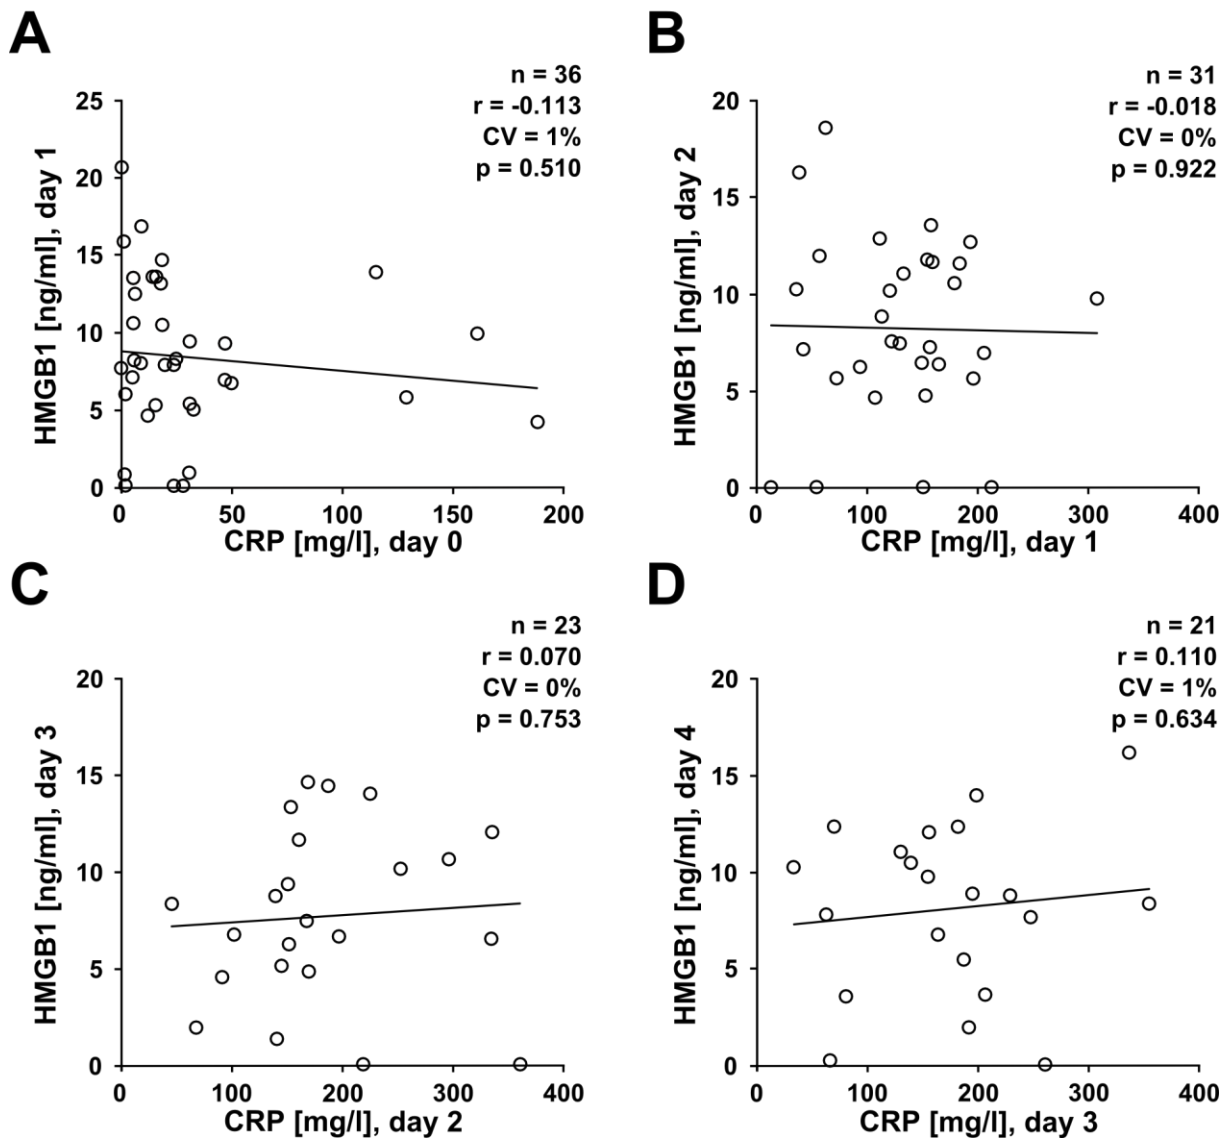

**FIGURE S4.** Levels of CRP do not negatively correlate with HMGB1 (high mobility group box 1 protein) levels in trauma patients. A monocentric prospective clinical study was performed on patients suffering from multiple traumata. Plasma levels of HMGB1 were measured at daily intervals from the day of admission (day 0) until day 4 after trauma and a correlation analysis was performed with CRP values obtained one day earlier. **(A)** HMGB1 at day 1 versus CRP at day 0, **(B)** HMGB1 at day 2 versus CRP at day 1, **(C)** HMGB1 at day 3 versus CRP at day 2, **(D)** HMGB1 at day 4 versus CRP at day 3. Linear regression analysis,  $r$  = correlation coefficient,  $CV$  = coefficient of variation.

**TABLE S1.** Correlation analyses of disease severity scores (day 0) with IL-1 $\beta$  levels (day 0 – day 4).

| <b>Variables</b> |                               |          |          |           |          |
|------------------|-------------------------------|----------|----------|-----------|----------|
| <b>Score</b>     | <b>IL-1<math>\beta</math></b> | <b>n</b> | <b>r</b> | <b>CV</b> | <b>p</b> |
| APACHE II        | day 0                         | 38       | -0.15    | 2%        | 0.38     |
| SOFA             | day 0                         | 38       | -0.23    | 5%        | 0.18     |
| APACHE II        | day 1                         | 36       | 0.03     | 0%        | 0.86     |
| SOFA             | day 1                         | 36       | -0.11    | 1%        | 0.53     |
| APACHE II        | day 2                         | 31       | -0.13    | 2%        | 0.49     |
| SOFA             | day 2                         | 31       | -0.24    | 6%        | 0.21     |
| APACHE II        | day 3                         | 23       | -0.49    | 24%       | 0.022    |
| SOFA             | day 3                         | 23       | -0.53    | 28%       | 0.011    |
| APACHE II        | day 4                         | 21       | -0.56    | 31%       | 0.01     |
| SOFA             | day 4                         | 21       | -0.47    | 22%       | 0.035    |

APACHE II, acute physiology and chronic health evaluation score; n, number of patients; p, p-value; r, correlation coefficient; CV, coefficient of variation; SOFA, sequential organ failure assessment score.

**TABLE S2.** Correlation analyses of disease severity scores (day 0) with CRP levels (day 0 – day 4).

| <b>Variables</b> |            |          |          |           |          |
|------------------|------------|----------|----------|-----------|----------|
| <b>Score</b>     | <b>CRP</b> | <b>n</b> | <b>r</b> | <b>CV</b> | <b>p</b> |
| APACHE II        | day 0      | 38       | 0.035    | 0%        | 0.84     |
| SOFA             | day 0      | 38       | 0.12     | 1%        | 0.47     |
| APACHE II        | day 1      | 36       | -0.029   | 0%        | 0.87     |
| SOFA             | day 1      | 36       | 0.091    | 1%        | 0.6      |
| APACHE II        | day 2      | 31       | -0.023   | 0%        | 0.9      |
| SOFA             | day 2      | 31       | 0.026    | 0%        | 0.89     |
| APACHE II        | day 3      | 23       | 0.2      | 4%        | 0.38     |
| SOFA             | day 3      | 23       | 0.23     | 5%        | 0.29     |
| APACHE II        | day 4      | 21       | 0.063    | 0%        | 0.79     |
| SOFA             | day 4      | 21       | 0.08     | 1%        | 0.74     |

APACHE II, acute physiology and chronic health evaluation score; n, number of patients; p, p-value; r, correlation coefficient; CV, coefficient of variation; SOFA, sequential organ failure assessment score.
